# Supplementary material
Source: publisher site journal article supplement (https://static.cambridge.org/content/id/urn:cambridge.org:id:article:S1368980019004828/resource/name/S1368980019004828supp001.xlsx)
Supplement: Supplementary file 1 [file S1368980019004828supp001.xlsx]

## Sheet: Table S1. Pref specific wt calc
Table S1. Prefecture specific weight calculation
No.	Prefecture	2012	2016
1	Hokkaido	411/249	434/213
2	Aomori	140/316	128/309
3	Iwate	142/253	119/208
4	Miyagi	191/285	158/194
5	Akita	84/299	95/239
6	Yamagata	97/353	69/230
7	Fukushima	210/255	176/209
8	Ibaraki	263/395	207/232
9	Tochigi	209/350	171/385
10	Gunma	314/334	125/267
11	Saitama	594/300	502/273
12	Chiba	485/263	451/303
13	Tokyo	923/233	550/209
14	Kanagawa	720/237	624/146
15	Niigata	219/308	191/268
16	Toyama	87/270	69/221
17	Ishikawa	125/256	96/239
18	Fukui	85/234	70/219
19	Yamanashi	99/281	64/201
20	Nagano	196/391	209/301
21	Gifu	210/255	172/317
22	Shizuoka	347/255	287/232
23	Aichi	600/173	538/205
24	Mie	189/216	173/213
25	Shiga	111/188	92/182
26	Kyoto	231/211	204/135
27	Osaka	718/218	687/182
28	Hyogo	506/260	466/282
29	Nara	91/261	99/212
30	Wakayama	82/238	72/232
31	Tottori	48/279	24/232
32	Shimane	72/240	71/301
33	Okayama	187/244	151/193
34	Hiroshima	254/240	253/190
35	Yamaguchi	194/269	137/249
36	Tokushima	93/240	82/281
37	Kagawa	86/303	69/270
38	Ehime	112/315	136/308
39	Kochi	111/287	74/172
40	Fukuoka	421/303	373/149
41	Saga	94/191	75/202
42	Nagasaki	156/238	94/192
43	Kumamoto	163/312	134*
44	Oita	162/336	90/279
45	Miyazaki	156/228	131/257
46	Kagoshima	186/242	125/193
47	Okinawa	148/346	125/193
* Kumamoto prefecture was excluded in 2016 weight calculation, because it was a natural disaster affected area. (Earthquake in April 2016 and Typhoon No.10 in August 2016).
The weight for the number of households in each prefecture was calculated by dividing the total number of households during the prior 3 years in each prefecture by that in 2012 and 2016. (eg. 2012 weight calculation = total number of household in each prefecture in 2009~2011 / number of household in each prefecture in 2012) (20)

## Sheet: Table S2. Number of participant
Table S2. Number of participants and their mean ages according to survey year (1973-2016)
Year	Men			Women
	Number of subjects	Mean Age	Age (Min~Max)	Number of subjects	Mean Age	Age (Min~Max)
1973	712	72	(65-91)	848	71.8	(65-96)
1975	566	71.4	(65-99)	791	71.8	(65-95)
1976	722	71.5	(65-99)	962	72.1	(65-99)
1977	586	71.8	(65-99)	811	72.1	(65-99)
1978	624	71.7	(65-89)	820	72	(65-97)
1979	649	71.9	(65-99)	905	72.5	(65-99)
1980	829	71.9	(65-94)	1050	72	(65-96)
1981	577	71.9	(65-90)	826	72.2	(65-91)
1982	689	72.1	(65-93)	931	72.3	(65-99)
1983	678	71.7	(65-94)	933	72.3	(65-96)
1984	740	72.5	(65-96)	972	72.4	(65-98)
1985	748	72.7	(65-95)	1048	72.9	(65-96)
1986	788	72.5	(65-96)	1062	72.5	(65-94)
1987	767	72.8	(65-98)	1139	73	(65-98)
1988	739	73	(65-95)	1080	72.9	(65-98)
1989	740	72.4	(65-98)	1015	72.7	(65-98)
1990	835	72.3	(65-97)	1156	72.8	(65-98)
1991	762	72.4	(65-94)	1046	72.6	(65-95)
1992	723	71.7	(65-95)	1017	72.9	(65-95)
1993	801	72.3	(65-96)	1121	73	(65-94)
1994	802	72.2	(65-96)	1066	73.2	(65-98)
1995	786	72.8	(65-94)	1074	73.3	(65-95)
1996	887	72	(65-96)	1144	72.9	(65-96)
1997	867	72.7	(65-97)	1226	73.5	(65-99)
1998	981	72.1	(65-96)	1276	73.4	(65-95)
1999	868	71.8	(65-94)	1167	73	(65-97)
2000	888	72.6	(65-91)	1107	73.5	(65-97)
2001	955	72.5	(65-99)	1230	73.5	(65-98)
2002	932	72.8	(65-94)	1236	73.8	(65-97)
2003	990	73.4	(65-98)	1314	73.6	(65-98)
2004	791	73.2	(65-94)	996	73.8	(65-99)
2005	859	73.1	(65-95)	1113	73.9	(65-97)
2006	904	73.5	(65-97)	1163	74.1	(65-100)
2007	914	73.4	(65-97)	1130	74	(65-99)
2008	1081	73.5	(65-94)	1342	74.4	(65-97)
2009	962	73.7	(65-95)	1278	74.6	(65-101)
2010	951	76.7	(65-94)	1219	74.1	(65-99)
2011	910	74.2	(65-96)	1145	75	(65-100)
2012	3556	73.9	(65-99)	4519	74.4	(65-104)
2013	1067	73.7	(65-98)	1281	74.1	(65-99)
2014	1138	73.7	(65-99)	1281	74.3	(65-99)
2015	924	73.8	(65-96)	1099	74.3	(65-103)
2016	3215	73.9	(65-98)	4100	74.5	(65-103)
Total	40503			53039

## Sheet: Table S3. Trend Analysis
Table S3. Joinpoint Regression Analysis for mean height, weight, BMI, overweight and obesity, and underweight prevalence in elderly men and women, for Years 1973 to 2016
Men	1973		2016		Trend 1		Trend 2		AAPC
	Crude mean	Age-adjusted mean	Crude mean	Age-adjusted mean	Years	APC	Years	APC	1973-2016
Height (cm)	157.1	156.2	163.5	163.1	1973-2016	0.1*			0.1*
Weight (kg)	52.6	51.4	63.1	62.6	1973-2016	0.5*			0.5*
BMI (kg/m2)	21.3	21	23.6	23.5	1973-2007	0.3*	2007-2016	0.1*	0.3*
Overweight and Obesity (%)	12.6	11.7	30.3	29.6	1973-2016	2.2*			2.2*
Underweight (%)	18.3	21.4	5	5.2	1973-2016	-3.2*			-3.2*
Women	1973		2016		Trend 1		Trend 2		AAPC
	Crude mean	Age-adjusted mean	Crude mean	Age-adjusted mean	Years	APC	Years	APC	1973-2016
Height (cm)	143.7	142.5	149.9	149.7	1973-2016	0.1*			0.1*
Weight (kg)	46.3	44.7	51.3	51.1	1973-2002	0.4*	2002-2016	0.1*	0.3*
BMI (kg/m2)	22.4	21.9	22.8	22.8	1973-2002	0.2*	2002-2016	-0.1*	0.1*
Overweight and Obesity (%)	23.1	19.4	24	23.9	1973-2002	1.0*	2002-2016	-1.5*	0.2
Underweight (%)	14.4	16.2	9.6	9.8	1973-2003	-1.9*	2003-2016	0.9	-1.1*
APC= Annual Percent Change
AAPC= Average Annual Percent Change
* P<0.05
